# Supplementary material for: Direct Electrochemical Generation of Catalytically Competent Oxyferryl Species of Classes I and P Dye Decolorizing Peroxidases
Source: MDPI journal article supplement (doi:10.3390/ijms222212532), 2021-11-20
Supplement: s1 [file s1]

## **Supplementary information**

# **Direct Electrochemical Generation of Catalytically Competent Oxyferryl Species of Classes I and P Dye Decolorizing Peroxidases**

**Magalí F. Scocozza<sup>1,2</sup>, Lígia O. Martins<sup>3</sup> and Daniel H. Murgida<sup>1,2\*</sup>**

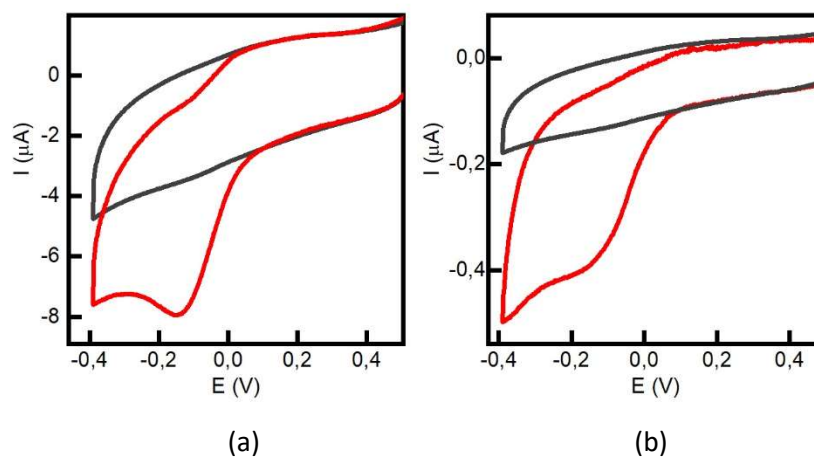

**Figure S1.** Cyclic voltammetry experiments for (a) BsDyP and (b) PpDyP under aerobic conditions.

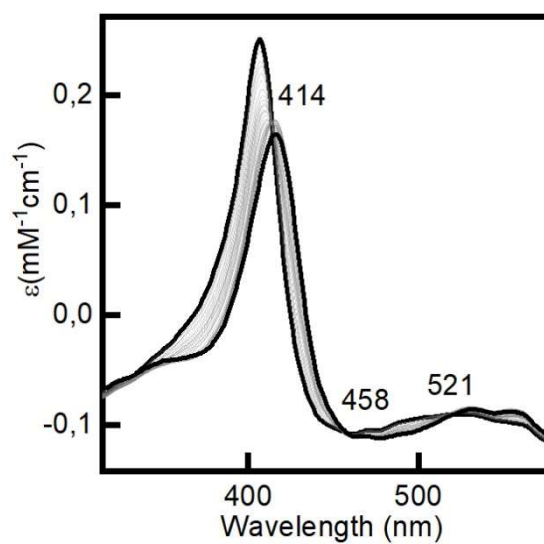

**Figure S2.** Conversion of BsDyP resting state to compound II species followed by UV-vis spectra. Isosbestic points can be identified at: 414 nm, 458 nm and 521 nm.

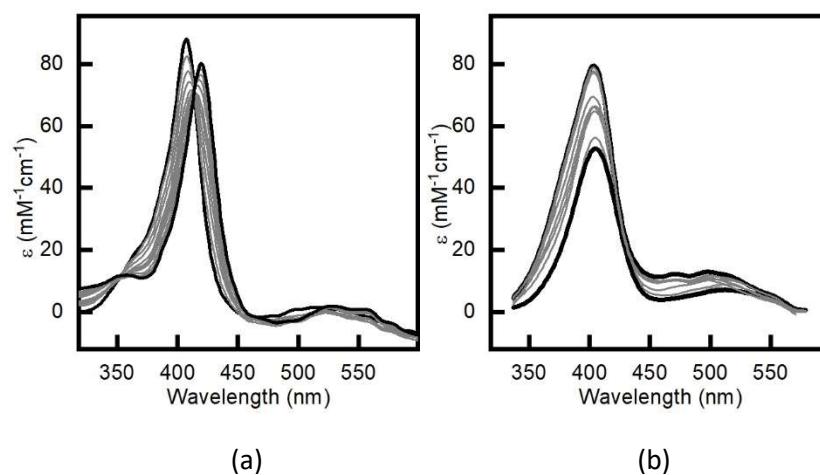

**Figure S3.** Electrochemical titrations of (a) BsDyP and (b) PpDyP followed by UV-vis spectra. Both titrations start at 0.210 V and end at -0.190 V (thick solid lines).

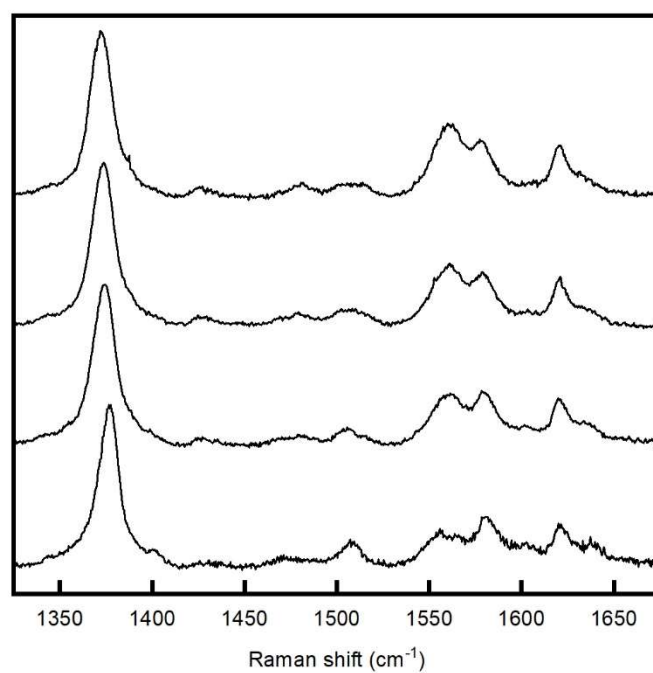

**Figure S4.** RR spectroscopy monitoring of BsDyP electrochemical titration to form compound II. From top to bottom: 0.260 V, 0.110 V, 0.040 V and -0.190 V applied potentials.

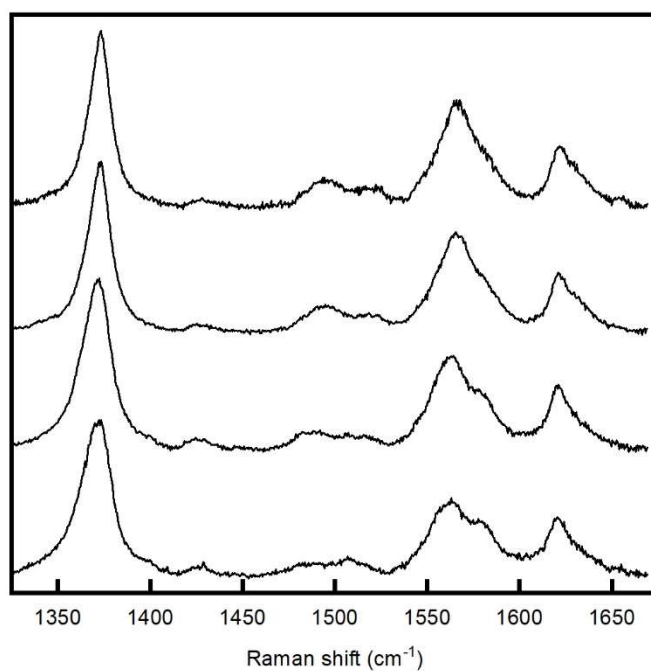

**Figure S5.** RR spectroscopy monitoring of PpDyP electrochemical titration to form compound II. From top to bottom: 0.260 V, 0.110 V, 0.040 V and -0.190 V applied potentials.

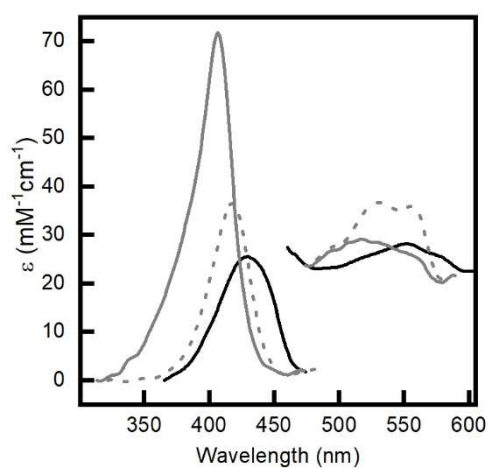

**Figure S6.** UV-vis absorption spectroscopy monitoring of BsDyP chemical titration with sodium dithionite. Resting state (thick grey line), compound II (dotted grey line), reduced form (thick black line).

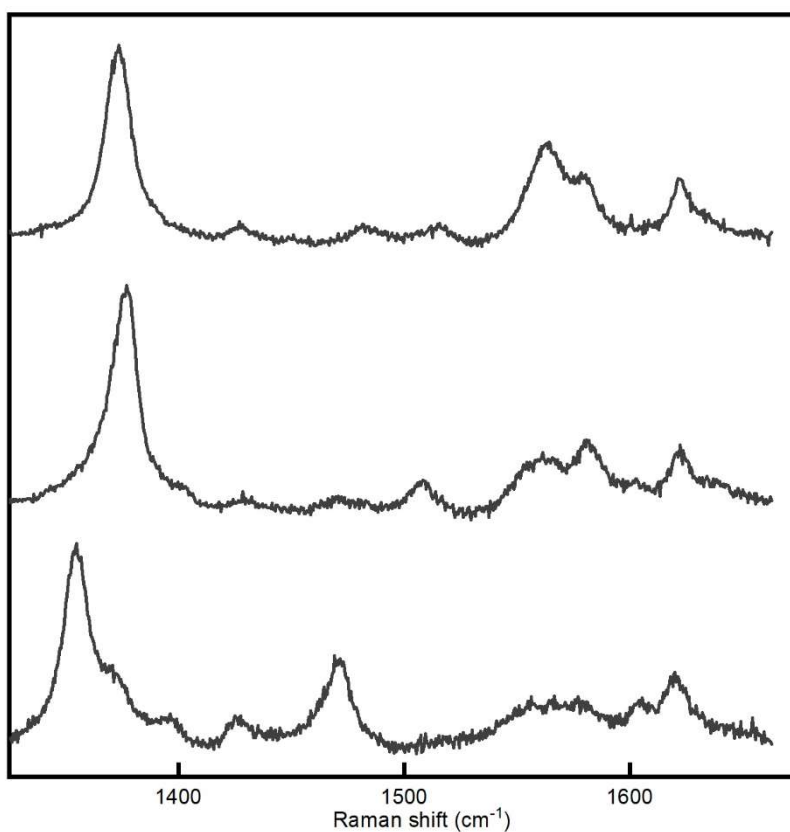

**Figure S7.** RR spectroscopy monitoring of BsDyP chemical titration with sodium dithionite. From top to bottom: resting state at 260 mV, first transition product: compound II (Soret at 418 nm) and second transition product: reduced form (Soret at 430 nm).

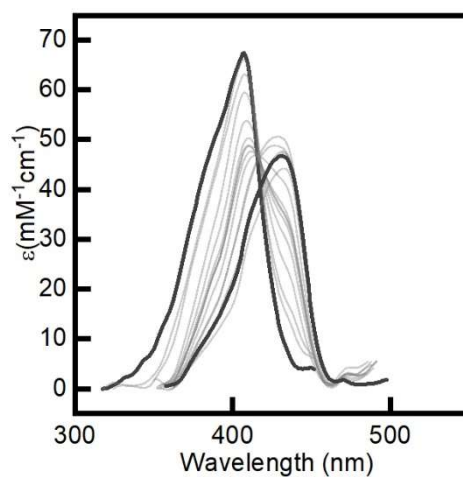

**Figure S8.** UV-vis absorption spectroscopy monitoring of PpDyP chemical titration with sodium dithionite. Soret maximum shifts from 405 nm to 431 nm (reduced form).

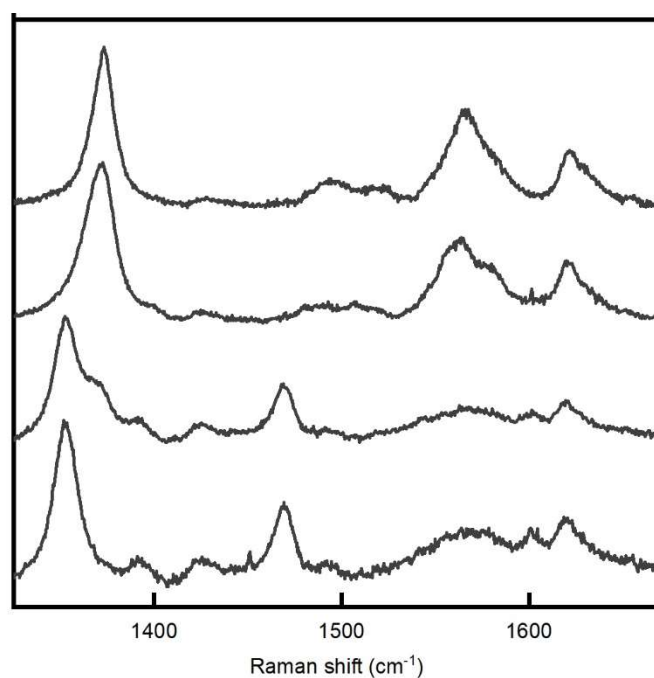

**Figure S9.** RR spectroscopy monitoring of PpDyP chemical titration with sodium dithionite. From top to bottom: resting state at 260 mV, first transition product: compound I, non-complete second transition and final product of second transition.

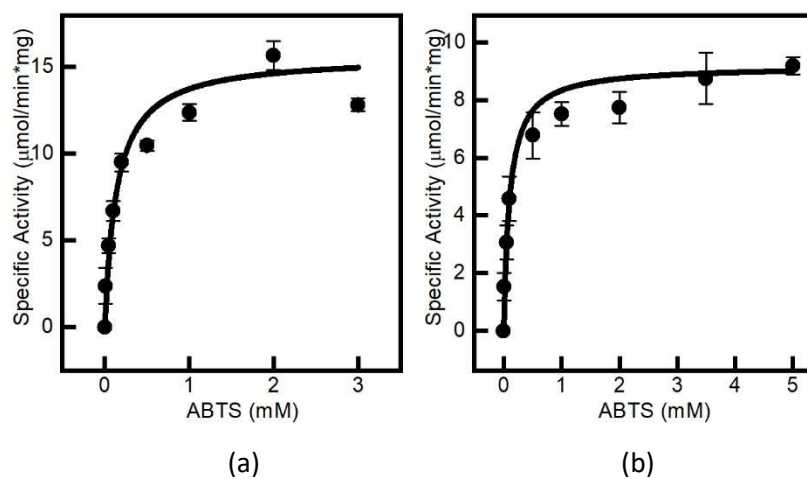

**Figure S10.** Steady state kinetic analysis for ABTS oxidation at pH 3.7 with electrochemical activation at poised potential -0.190 V for (a) BsDyP and (b) PpDyP.

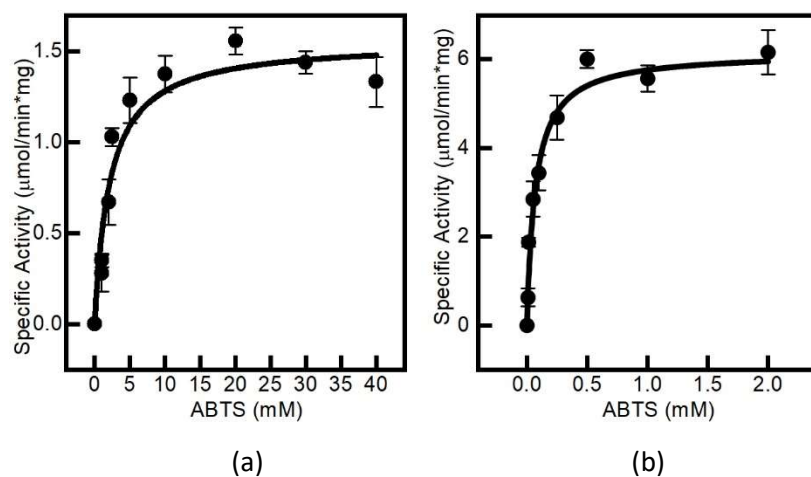

**Figure S11.** Steady state kinetic analysis for ABTS oxidation at pH 8.5 with electrochemical activation at poised potential -0.190 V for (a) BsDyP and (b) PpDyP.

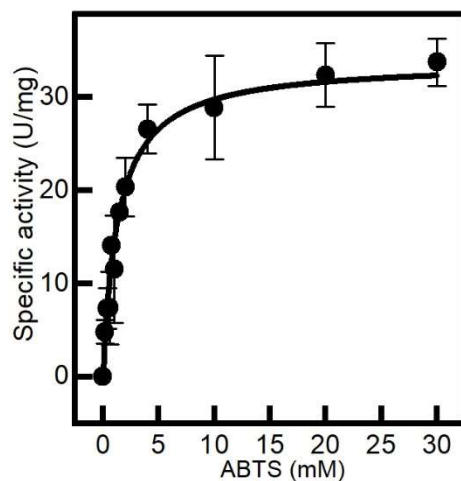

**Figure S12.** Steady state kinetic analysis for ABTS oxidation using H<sub>2</sub>O<sub>2</sub> as electron acceptor for PpDyP at pH 4.3.

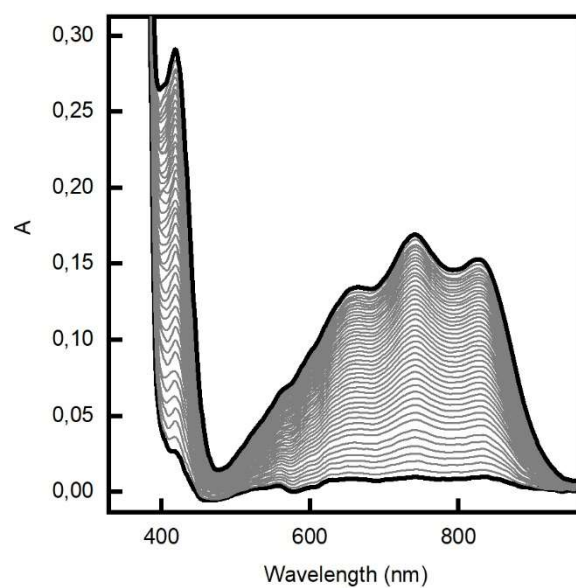

**Figure S13.** UV-vis absorption spectroscopy monitoring of ABTS oxidation, initialized at poised potential -0.190 V.
